# Supplementary material for: Botulinum Toxin for Pain Relief in Cancer Patients: A Systematic Review of Randomized Controlled Trials
Source: MDPI journal article supplement (doi:10.3390/toxins16030153), 2024-03-15
Supplement: s1 [file s1]

**Table S2.** Characteristics of excluded studies assessed in full-text.

| <i>Study</i>                  | <i>Reason for exclusion</i> |
|-------------------------------|-----------------------------|
| Abedini et al. 2020           | No cancer patients          |
| Attal et al. 2016             | No cancer patients          |
| Bach et al. 2012              | Not RCT                     |
| Disphanurat et al. 2021       | No cancer patients          |
| Douglas et al. 2002           | Not RCT                     |
| Eckardt et al. 2002           | Not RCT                     |
| Figus et al. 2009             | Not RCT                     |
| Ginsberg et al. 2012          | No cancer patients          |
| Grise et al. 2010             | No cancer patients          |
| Hackert et al. 2016           | No cancer patients          |
| Hartl et al. 2008             | Not RCT                     |
| Hartl et al. 2008 (2)         | Not RCT                     |
| Keaney et al. 2019            | No cancer patients          |
| Kumagai et al. 2014           | No cancer patients          |
| Kuo 2005                      | Not RCT                     |
| Laskawi et al. 2013           | Not RCT                     |
| Layeeque et al. 2004          | Not RCT                     |
| Lee et al. 2017               | No BTX intervention         |
| Lee et al. 2021               | No cancer patients          |
| Lee et al. 2021 (2)           | No cancer patients          |
| Lemaine et al. 2020           | Not just cancer patients    |
| Ma et al. 2021                | Not just cancer patients    |
| Mittal et al. 2012            | Not RCT                     |
| Naderinabi et al. 2017        | No cancer patients          |
| Naik et al. 2015              | No cancer patients          |
| Puentes-Gutiérrez et al. 2021 | Not RCT                     |
| Richardson et al. 2000        | Not just cancer patients    |
| Rostami et al. 2016           | Not RCT                     |
| Stewart et al. 2017           | Not RCT                     |
| Verghese et al. 2020          | No cancer patients          |

Wittekindt et al. 2004

Not RCT

Yaraghi et al. 2018

No cancer patients

Zelken et al. 2015

Not just cancer patients

Zirovich et al. 2021

No cancer patients

---
