# Supplementary material for: Botulinum Toxin for Pain Relief in Cancer Patients: A Systematic Review of Randomized Controlled Trials
Source: MDPI journal article supplement (doi:10.3390/toxins16030153), 2024-03-15
Supplement: s1 [file s1]

**Table S1.** Search strategy.

---

**PubMed:**

("botulinum toxins"[MeSH Terms] OR ("botulinum"[All Fields] AND "toxins"[All Fields]) OR "botulinum toxins"[All Fields] OR ("botulinum"[All Fields] AND "toxin"[All Fields]) OR "botulinum toxin"[All Fields] OR "BTX"[All Fields] OR ("botulinum toxins"[MeSH Terms] OR ("botulinum"[All Fields] AND "toxins"[All Fields]) OR "botulinum toxins"[All Fields] OR ("botulinum"[All Fields] AND "neurotoxins"[All Fields]) OR "botulinum neurotoxins"[All Fields]) OR ("botulinum toxins"[MeSH Terms] OR ("botulinum"[All Fields] AND "toxins"[All Fields]) OR "botulinum toxins"[All Fields] OR ("clostridium"[All Fields] AND "botulinum"[All Fields] AND "toxins"[All Fields]) OR "clostridium botulinum toxins"[All Fields]) OR ("botuline"[All Fields] OR "botulinic"[All Fields] OR "botulinum toxins"[MeSH Terms] OR ("botulinum"[All Fields] AND "toxins"[All Fields]) OR "botulinum toxins"[All Fields] OR "botulin"[All Fields])) AND ("cancer s"[All Fields] OR "cancerated"[All Fields] OR "canceration"[All Fields] OR "cancerization"[All Fields] OR "cancerized"[All Fields] OR "cancerous"[All Fields] OR "neoplasms"[MeSH Terms] OR "neoplasms"[All Fields] OR "cancer"[All Fields] OR "cancers"[All Fields] OR "carcinoma"[MeSH Terms] OR "carcinoma"[All Fields] OR "carcinomas"[All Fields] OR "carcinoma s"[All Fields] OR "cysts"[MeSH Terms] OR "cysts"[All Fields] OR "cyst"[All Fields] OR "neurofibroma"[MeSH Terms] OR "neurofibroma"[All Fields] OR "neurofibromas"[All Fields] OR "tumor s"[All Fields] OR "tumoral"[All Fields] OR "tumorous"[All Fields] OR "tumour"[All Fields] OR "neoplasms"[MeSH Terms] OR "neoplasms"[All Fields] OR "tumor"[All Fields] OR "tumour s"[All Fields] OR "tumoural"[All Fields] OR "tumourous"[All Fields] OR "tumours"[All Fields] OR "tumors"[All Fields])

**Records: 1326**

---

**Scopus:**

TITLE-ABS-KEY ( ( ( botulinum AND toxin ) OR ( Botulinum AND Neurotoxins ) OR ( Clostridium AND botulinum AND Toxins ) OR ( Botulin ) OR ( BTX ) ) AND ( ( cancer ) OR ( neoplasms ) OR ( carcinoma ) OR ( tumor ) ) )

**Records: 3044**

---

**Web of Science:**

ALL= ((botulinum toxin OR BTX OR Botulinum Neurotoxins OR Clostridium botulinum Toxins OR Botulin) AND (Cancer OR Neoplasm OR Carcinoma OR Tumor))

**Records: 1326**

---

**Cochrane:**

|    |                                               |
|----|-----------------------------------------------|
| ID | Search                                        |
| #1 | MeSH descriptor: [cancer] explode all trees   |
| #2 | MeSH descriptor: [neoplasm] explode all trees |

---

- 
- |     |                                                                   |
|-----|-------------------------------------------------------------------|
| #3  | MeSH descriptor: [tumor] explode all trees                        |
| #4  | MeSH descriptor: [carcinoma] explode all trees                    |
| #5  | MeSH descriptor: [botulinum toxin] explode all trees              |
| #6  | MeSH descriptor: [BTX] explode all trees                          |
| #7  | MeSH descriptor: [Botulinum Neurotoxins] explode all trees        |
| #8  | MeSH descriptor: [Clostridium botulinum Toxins] explode all trees |
| #9  | MeSH descriptor: [Botulinum] explode all trees                    |
| #10 | (#1 OR #2 OR #3 OR #4) AND (#5 OR #6 OR #7 OR #8 OR #9)           |

---

***Records: 128***

---
